# Supplementary material for: HIF2α induces cardiomyogenesis via Wnt/β-catenin signaling in mouse embryonic stem cells
Source: PubMed Central journal article supplement (PMC4399227; doi:10.1186/s12967-015-0447-7), 2015-03-14
Supplement: 12967_2015_447_MOESM1_ESM.pdf [file 12967_2015_447_MOESM1_ESM.pdf]

**Table S1. Primers used for real-time PCR**

| Gene          | Forward Primer(5'→3')  | Reverse Primer(5'→3')  |
|---------------|------------------------|------------------------|
| Gapdh         | TGTGAGGGAGATGCTCAGTG   | TGTTCTACCCCCAATGTGT    |
| Oct4          | GAAGCAGAAGAGGATCACCTTG | TTCTTAAGGCTGAGCTGCAAG  |
| Sox2          | ATGGGCTCTGTGGTCAAGTC   | CCCTCCCAATTCCCTTGTAT   |
| Nanog         | TCCAGAAGAGGGCGTCAGAT   | CAAATCCCAGCAACCACATG   |
| HIF2 $\alpha$ | CTAAGTGGCCTGTGGGTGAT   | GTGTCTTGGAAGGCTTGCTC   |
| Gata4         | TCTCCCAGGAACATCAAAACC  | GTGTGAAGGGGTGAAAAGG    |
| Tbx5          | GGAAAGATGAGGAATGTTCCAG | GTGTTACAGCTGATGTCCTCCA |
| Nkx2.5        | GCTACAAGTGCAAGCGACAG   | GGGTAGGCGTTGTAGCCATA   |
| Mef2C         | GCCCTGAGTCTGAGGACAAG   | ATCAGACCGCCTGTGTTACC   |
| Mesp1         | CCTTCGGAGGGAGTAGATCC   | AAAGCTTGTGCCTGCTTCAT   |
| cTnT          | CCTGCAGGAAAAGTTCAAGC   | TTCCCACGAGTTTTGGAGAC   |
| $\alpha$ -MHC | GATGCCCAGATGGCTGACTT   | GGTCAGCATGGCCATGTCCT   |
